# Supplementary material for: Cultural Differences in People’s Psychological Response to COVID-19
Source: PubMed Central journal article supplement (PMC8312224; doi:10.3389/fpsyg.2021.636062), 2021-07-12
Supplement: Data_Sheet_1.pdf [file Data_Sheet_1.pdf]

## Supplementary Material

### 1. Measurement invariance tests based on data from Time 1.

In general, we have made decisions on model fit holistically based on the following criteria in evaluating the model fit indices. The specific cutoff values were used following previous research (Chen, 2007; Hu & Bentler, 1999; Putnick & Bornstein, 2016). RMSEA estimates can be artificially high for models with low degrees of freedom, so if other indices were acceptable but RMSEA was not in models with small dfs, we decided to accept the model. Furthermore, among all other indices (besides RMSEA), if most of them were acceptable while one or two were marginal (e.g., .033 instead of .03), we decided to accept the model.

Table S1. Model fit criteria.

| CFI | RMSEA<br>(90%CI) | SRMR | $\Delta$ CFI | $\Delta$ RMSEA | $\Delta$ SRMR                                                 |
|-----|------------------|------|--------------|----------------|---------------------------------------------------------------|
| .90 | .08              | .08  | .01          | .015           | .030 (for metrics invariance)<br>.015 (for scalar invariance) |

Chen, F. F. (2007). Sensitivity of goodness of fit indexes to lack of measurement invariance. *Structural Equation Modeling, 14*, 464–504. doi:10.1080/10705510701301834.

Putnick, D. L., & Bornstein, M. H. (2016). Measurement invariance conventions and reporting: The state of the art and future directions for psychological research. *Developmental review, 41*, 71-90,

Hu, L. & Bentler, P. (1999). Cutoff criteria for fit indices in covariance structure analysis: conventional criteria versus new alternatives. *Structural Equation Modeling, 6*, 1-55.

When the full scale did not establish measure invariance, we then examined the factor loadings and item intercepts on an item-by-item basis to determine which items were the main contributors toward measurement noninvariance. We followed this procedure to trim down the items for each measure.

#### A. Measurement invariance tests: adapted WHO-10

Table S2: Measurement invariance tests for Adapted WHO-10 with all 10 items.

| Model              | $\chi^2$ (df) | CFI  | RMSEA | SRMR | $\Delta\chi^2$ ( $\Delta$ df) | $\Delta$ CFI | $\Delta$ RMSEA | $\Delta$ SRMR | Decision |
|--------------------|---------------|------|-------|------|-------------------------------|--------------|----------------|---------------|----------|
| Config             | 208.80(70)    | .944 | .085  | .041 |                               |              |                |               | accept   |
| Metrics (loading)  | 244.86(79)    | .933 | .087  | .075 | 35.06(9);<br>$p < .0001$      | .011         | .002           | .033          | accept   |
| Scalar (intercept) | 507.95(88)    | .830 | .131  | .114 | 263.09(9);<br>$p < .0001$     | .103         | .044           | .039          | reject   |

Partial measurement invariance (configural, and metric, and scalar) was established with 5 of the 10 items (1, 3, 4, 6, 10). Note: RMSEA is higher than ideal, but the other indices suggest a decent fit.

Table S3: Measurement invariance tests for Adapted WHO-10 with 5 items.

| Model              | $\chi^2$ (df) | CFI  | RMSEA | SRMR | $\Delta\chi^2$ ( $\Delta$ df) | $\Delta$ CFI | $\Delta$ RMSEA | $\Delta$ SRMR | Decision |
|--------------------|---------------|------|-------|------|-------------------------------|--------------|----------------|---------------|----------|
| Config             | 40.63(10)     | .968 | .105  | .033 |                               |              |                |               | accept   |
| Metrics (loading)  | 56.15(14)     | .956 | .104  | .065 | 15.52 (4);<br>$p=.0037$       | .012         | .001           | .033          | accept   |
| Scalar (intercept) | 61.50(18)     | .954 | .093  | .068 | 5.35 (4);<br>$p=.254$         | .001         | .011           | .003          | accept   |

### B. SWLS

Table S4: Measurement invariance tests for SWLS with all 5 items.

| Model              | $\chi^2$ (df) | CFI  | RMSEA | SRMR | $\Delta\chi^2$ ( $\Delta$ df) | $\Delta$ CFI | $\Delta$ RMSEA | $\Delta$ SRMR | Decision |
|--------------------|---------------|------|-------|------|-------------------------------|--------------|----------------|---------------|----------|
| Config             | 39.40(10)     | .979 | .103  | .027 |                               |              |                |               | accept   |
| Metrics (loading)  | 53.97(14)     | .972 | .101  | .058 | 14.57(4);<br>$p=.006$         | .007         | .001           | .031          | accept   |
| Scalar (intercept) | 223.89(18)    | .854 | .202  | .117 | 169.92(4);<br>$p<.0001$       | .118         | .101           | .059          | reject   |

Partial measurement invariance (configural, and metric) was established with 4 of the 5 items (1-3, 5), as well as with all 5 items. Dropping items did not improve measure invariance.

Table S5: Measurement invariance tests for SWLS with 4 items.

| Model              | $\chi^2$ (df) | CFI | RMSEA | SRMR | $\Delta\chi^2$ ( $\Delta$ df) | $\Delta$ CFI | $\Delta$ RMSEA | $\Delta$ SRMR | Decision |
|--------------------|---------------|-----|-------|------|-------------------------------|--------------|----------------|---------------|----------|
| Config             | 17.22(4)      | .99 | .109  | .019 |                               |              |                |               | accept   |
| Metrics (loading)  | 25.30(7)      | .98 | .097  | .047 | 8.07(3);<br>$p=.044$          | .005         | .012           | .029          | accept   |
| Scalar (intercept) | 83.28(10)     | .93 | .162  | .091 | 57.98(3);<br>$p<.001$         | .054         | .065           | .043          | reject   |

### C. State Optimism (SOM-7)

Table S6: Measurement invariance tests for SOM-7 with all 7 items.

| Model             | $\chi^2$ (df) | CFI  | RMSEA | SRMR | $\Delta\chi^2$ ( $\Delta$ df) | $\Delta$ CFI | $\Delta$ RMSEA | $\Delta$ SRMR | Decision |
|-------------------|---------------|------|-------|------|-------------------------------|--------------|----------------|---------------|----------|
| Config            | 69.42(28)     | .980 | .073  | .027 |                               |              |                |               | accept   |
| Metrics (loading) | 82.04(34)     | .976 | .071  | .048 | 12.62(6);<br>$p=.049$         | .003         | .002           | .020          | accept   |

|                    |            |      |      |      |                       |      |      |      |        |
|--------------------|------------|------|------|------|-----------------------|------|------|------|--------|
| Scalar (intercept) | 161.10(40) | .940 | .104 | .063 | 79.05 (6);<br>p<.0001 | .036 | .033 | .016 | reject |
|--------------------|------------|------|------|------|-----------------------|------|------|------|--------|

Partial measurement invariance (configural, metric, and scalar) was established with 6 of the 7 items (1-6).

Table S7: Measurement invariance tests for SOM-7 with 6 items.

| Model              | $\chi^2$ (df) | CFI  | RMSEA | SRMR | $\Delta\chi^2$ ( $\Delta$ df) | $\Delta$ CFI | $\Delta$ RMSEA | $\Delta$ SRMR | Decision |
|--------------------|---------------|------|-------|------|-------------------------------|--------------|----------------|---------------|----------|
| Config             | 42.31(18)     | .984 | .070  | .026 |                               |              |                |               | accept   |
| Metrics (loading)  | 50.53(23)     | .982 | .066  | .043 | 8.22(5);<br>p=.145            | .002         | .004           | .017          | accept   |
| Scalar (intercept) | 58.20(28)     | .980 | .062  | .046 | 7.67(5);<br>p=.175            | .002         | .003           | .004          | accept   |

#### D. Resilience (BRC)

Resilience was measured with the 4-item Brief Resilience Coping Scale (BRC; Sinclair & Wallston, 2004). Participants indicated (1 = *does not describe me at all*, 5 = *describes me very well*) how well each of the four statements described their actions “*these days*” (e.g., “*I believe I can grow in positive ways by dealing with difficult situations*”).

Table S8: Measurement invariance tests for BRC with all 4 items.

| Model              | $\chi^2$ (df) | CFI  | RMSEA | SRMR | $\Delta\chi^2$ ( $\Delta$ df) | $\Delta$ CFI | $\Delta$ RMSEA | $\Delta$ SRMR | Decision |
|--------------------|---------------|------|-------|------|-------------------------------|--------------|----------------|---------------|----------|
| Config             | 18.42(4)      | .954 | .114  | .034 |                               |              |                |               | accept   |
| Metrics (loading)  | 26.28(7)      | .938 | .100  | .052 | 7.86(3);<br>p=.049            | .016         | .014           | .017          | accept?  |
| Scalar (intercept) | 119.45(10)    | .650 | .199  | .116 | 93.17(3);<br>p<.001           | .289         | .099           | .065          | reject   |

Dropping any one of the 4 items did not improve the model fit. Among all 3-item models, the following (with items 2-4) provided the best indices, but the overall model fit was not better than that with all 4 items, and internal consistency of the 3-item models dropped to the .4-.5 range.

Table S9: Measurement invariance tests for BRC with 3 items.

| Model             | $\chi^2$ (df) | CFI  | RMSEA | SRMR | $\Delta\chi^2$ ( $\Delta$ df) | $\Delta$ CFI | $\Delta$ RMSEA | $\Delta$ SRMR | Decision |
|-------------------|---------------|------|-------|------|-------------------------------|--------------|----------------|---------------|----------|
| Config            | 0 (0)         | 1.00 | .000  | .000 |                               |              |                |               | accept   |
| Metrics (loading) | 3.13(2)       | .99  | .045  | .024 | 3.13(2);<br>p=.209            | .007         | .045           | .024          | reject   |

|                    |          |     |      |      |                             |      |      |      |        |
|--------------------|----------|-----|------|------|-----------------------------|------|------|------|--------|
| Scalar (intercept) | 76.02(4) | .56 | .260 | .126 | 76.02(2);<br><i>p</i> <.001 | .430 | .215 | .101 | reject |
|--------------------|----------|-----|------|------|-----------------------------|------|------|------|--------|

### E. Meaning in life

Table S10: Measurement invariance tests for MIL with all 10 items.

| Model              | $\chi^2$ (df) | CFI  | RMSEA | SRMR | $\Delta\chi^2$ ( $\Delta$ df) | $\Delta$ CFI | $\Delta$ RMSEA | $\Delta$ SRMR | Decision |
|--------------------|---------------|------|-------|------|-------------------------------|--------------|----------------|---------------|----------|
| Config             | 203.88(68)    | .950 | .085  | .059 |                               |              |                |               | accept   |
| Metrics (loading)  | 217.32(76)    | .948 | .082  | .065 | 13.44 (8);<br><i>p</i> =.097  | .002         | .003           | .005          | accept   |
| Scalar (intercept) | 314.82 (84)   | .916 | .100  | .076 | 97.50 (8);<br><i>p</i> <.0001 | .033         | .018           | .012          | reject   |

Partial measurement invariance (configural, metric, and scalar) was established with 8 of the 10 items (1,3-8, 10).

Table S11: Measurement invariance tests for MIL with 8 items.

| Model              | $\chi^2$ (df) | CFI  | RMSEA | SRMR | $\Delta\chi^2$ ( $\Delta$ df) | $\Delta$ CFI | $\Delta$ RMSEA | $\Delta$ SRMR | Decision |
|--------------------|---------------|------|-------|------|-------------------------------|--------------|----------------|---------------|----------|
| Config             | 97.32(38)     | .972 | .075  | .051 |                               |              |                |               | accept   |
| Metrics (loading)  | 105.52(44)    | .971 | .071  | .058 | 8.20 (6),<br><i>p</i> =.224   | .001         | .004           | .007          | accept   |
| Scalar (intercept) | 136.53(50)    | .959 | .079  | .064 | 31.05(6);<br><i>p</i> <.001   | .012         | .008           | .005          | accept   |

### F. LOT-R

Table S12: Measurement invariance tests for LOT-R with all 6 items.

| Model              | $\chi^2$ (df) | CFI  | RMSEA | SRMR | $\Delta\chi^2$ ( $\Delta$ df) | $\Delta$ CFI | $\Delta$ RMSEA | $\Delta$ SRMR | Decision |
|--------------------|---------------|------|-------|------|-------------------------------|--------------|----------------|---------------|----------|
| Config             | 108.14(18)    | .893 | .134  | .062 |                               |              |                |               | reject   |
| Metrics (loading)  | 148.66(23)    | .850 | .140  | .090 | 40.52 (5);<br><i>p</i> <.0001 | .042         | .006           | .027          | reject   |
| Scalar (intercept) | 343.47(28)    | .625 | .201  | .143 | 194.81(5);<br><i>p</i> <.0001 | .226         | .061           | .053          | reject   |

Arguably partial measurement invariance (configural) was established with 4 of the 6 items (3-6), but it was not better than the full scale.

Table S13: Measurement invariance tests for LOT-R with 4 items.

| Model              | $\chi^2$ (df) | CFI  | RMSEA | SRMR | $\Delta\chi^2$ ( $\Delta$ df) | $\Delta$ CFI | $\Delta$ RMSEA | $\Delta$ SRMR | Decision |
|--------------------|---------------|------|-------|------|-------------------------------|--------------|----------------|---------------|----------|
| Config             | 15.70 (4)     | .977 | .102  | .034 |                               |              |                |               | accept?  |
| Metrics (loading)  | 40.11 (7)     | .936 | .130  | .074 | 24.40 (3);<br>$p < .0001$     | .042         | .028           | .041          | reject   |
| Scalar (intercept) | 138.47(10)    | .750 | .214  | .123 | 98.36 (3);<br>$p < .0001$     | .186         | .084           | .048          | reject   |

## 2. Measurement invariance tests based on data from Time 2

### G. Measurement invariance tests: adapted WHO-10

Table S14: Measurement invariance tests for Adapted WHO-10 with all 10 items.

| Model              | $\chi^2$ (df) | CFI  | RMSEA | SRMR | $\Delta\chi^2$ ( $\Delta$ df) | $\Delta$ CFI | $\Delta$ RMSEA | $\Delta$ SRMR | Decision |
|--------------------|---------------|------|-------|------|-------------------------------|--------------|----------------|---------------|----------|
| Config             | 179.16(70)    | .951 | .081  | .040 |                               |              |                |               | accept   |
| Metrics (loading)  | 213.12(79)    | .939 | .084  | .076 | 33.96(9);<br>$p < .0001$      | .011         | .004           | .036          | accept?  |
| Scalar (intercept) | 345.04(88)    | .884 | .111  | .099 | 131.92(9);<br>$p < .0001$     | .056         | .026           | .023          | reject   |

Partial measurement invariance (configural, and metric, and scalar) was established with 5 of the 10 items (1, 3, 4, 6, 10).

Table S15: Measurement invariance tests for Adapted WHO-10 with 5 items.

| Model              | $\chi^2$ (df) | CFI  | RMSEA | SRMR | $\Delta\chi^2$ ( $\Delta$ df) | $\Delta$ CFI | $\Delta$ RMSEA | $\Delta$ SRMR | Decision |
|--------------------|---------------|------|-------|------|-------------------------------|--------------|----------------|---------------|----------|
| Config             | 30.31(10)     | .974 | .092  | .031 |                               |              |                |               | accept   |
| Metrics (loading)  | 34.76(14)     | .973 | .079  | .044 | 4.45 (4);<br>$p = .349$       | .001         | .013           | .013          | accept   |
| Scalar (intercept) | 48.47(18)     | .960 | .084  | .053 | 13.72 (4);<br>$p = .008$      | .013         | .005           | .010          | accept   |

### H. SWLS

Table S16: Measurement invariance tests for SWLS with all 5 items.

| Model  | $\chi^2$ (df) | CFI  | RMSEA | SRMR | $\Delta\chi^2$ ( $\Delta$ df) | $\Delta$ CFI | $\Delta$ RMSEA | $\Delta$ SRMR | Decision |
|--------|---------------|------|-------|------|-------------------------------|--------------|----------------|---------------|----------|
| Config | 31.25(10)     | .984 | .094  | .027 |                               |              |                |               | accept   |

|                    |            |      |      |      |                               |      |      |      |        |
|--------------------|------------|------|------|------|-------------------------------|------|------|------|--------|
| Metrics (loading)  | 35.25(14)  | .984 | .079 | .040 | 4.00(4);<br><i>p</i> =.406    | .000 | .015 | .013 | accept |
| Scalar (intercept) | 151.22(18) | .899 | .175 | .094 | 115.97(4);<br><i>p</i> <.0001 | .085 | .096 | .054 | reject |

Partial measurement invariance (configural, and metric) was established with all 5 items. Dropping items did not improve the indices; the best indices when dropping items were with 4 items (1-3, 5).

Table S17: Measurement invariance tests for SWLS with 4 items.

| Model              | $\chi^2$ (df) | CFI  | RMSEA | SRMR | $\Delta\chi^2$ ( $\Delta$ df) | $\Delta$ CFI | $\Delta$ RMSEA | $\Delta$ SRMR | Decision |
|--------------------|---------------|------|-------|------|-------------------------------|--------------|----------------|---------------|----------|
| Config             | 12.88(4)      | .991 | .096  | .017 |                               |              |                |               | accept   |
| Metrics (loading)  | 13.47(7)      | .994 | .062  | .019 | .59(3);<br><i>p</i> =.900     | .002         | .034           | .002          | reject   |
| Scalar (intercept) | 50.69(10)     | .961 | .130  | .059 | 37.22(3);<br><i>p</i> <.0001  | .033         | .068           | .040          | reject   |

### I. State Optimism (SOM-7)

Table S18: Measurement invariance tests for SOM-7 with all 7 items.

| Model              | $\chi^2$ (df) | CFI  | RMSEA | SRMR | $\Delta\chi^2$ ( $\Delta$ df) | $\Delta$ CFI | $\Delta$ RMSEA | $\Delta$ SRMR | Decision |
|--------------------|---------------|------|-------|------|-------------------------------|--------------|----------------|---------------|----------|
| Config             | 29.42(28)     | .999 | .015  | .019 |                               |              |                |               | accept   |
| Metrics (loading)  | 41.50(34)     | .996 | .030  | .047 | 12.08(6);<br><i>p</i> =.060   | .003         | .016           | .029          | accept   |
| Scalar (intercept) | 96.10(40)     | .970 | .076  | .062 | 54.60(6);<br><i>p</i> <.0001  | .026         | .046           | .015          | reject   |

Partial measurement invariance (configural, metric, and scalar) was established with 6 of the 7 items (1-6).

Table S19: Measurement invariance tests for SOM-7 with 6 items.

| Model              | $\chi^2$ (df) | CFI  | RMSEA | SRMR | $\Delta\chi^2$ ( $\Delta$ df) | $\Delta$ CFI | $\Delta$ RMSEA | $\Delta$ SRMR | Decision |
|--------------------|---------------|------|-------|------|-------------------------------|--------------|----------------|---------------|----------|
| Config             | 21.94(18)     | .997 | .030  | .018 |                               |              |                |               | accept   |
| Metrics (loading)  | 33.17(23)     | .993 | .043  | .049 | 11.23(5);<br><i>p</i> =.047   | .004         | .013           | .031          | accept   |
| Scalar (intercept) | 41.63(28)     | .991 | .045  | .052 | 8.46(5);<br><i>p</i> =.133    | .002         | .002           | .003          | accept   |

### J. Resilience (BRC)

Table S20: Measurement invariance tests for BRC with all 4 items.

| Model              | $\chi^2$ (df) | CFI  | RMSEA | SRMR | $\Delta\chi^2$ ( $\Delta$ df) | $\Delta$ CFI | $\Delta$ RMSEA | $\Delta$ SRMR | Decision |
|--------------------|---------------|------|-------|------|-------------------------------|--------------|----------------|---------------|----------|
| Config             | 6.22(4)       | .992 | .048  | .020 |                               |              |                |               | accept   |
| Metrics (loading)  | 11.78(7)      | .983 | .053  | .041 | 5.57(3);<br>$p=.134$          | .009         | .005           | .022          | accept   |
| Scalar (intercept) | 97.37(10)     | .691 | .191  | .119 | 85.57(3);<br>$p<.001$         | .292         | .137           | .078          | reject   |

The models with the best indices after dropping one or more items had 3 items (with items 1-3). Like the full scale, it established metrics invariance, but not scalar invariance.

Table S21: Measurement invariance tests for BRC with 3 items.

| Model              | $\chi^2$ (df) | CFI   | RMSEA | SRMR | $\Delta\chi^2$ ( $\Delta$ df) | $\Delta$ CFI | $\Delta$ RMSEA | $\Delta$ SRMR | Decision |
|--------------------|---------------|-------|-------|------|-------------------------------|--------------|----------------|---------------|----------|
| Config             | 0 (0)         | 1.000 | .000  | .000 |                               |              |                |               | accept   |
| Metrics (loading)  | 1.69(2)       | 1.000 | .000  | .020 | 1.69(2);<br>$p=.430$          | .000         | .000           | .020          | accept   |
| Scalar (intercept) | 13.88(4)      | .954  | .101  | .049 | 12.19(2);<br>$p=.002$         | .046         | .101           | .029          | reject   |

#### K. Meaning in life

Table S22: Measurement invariance tests for MIL with all 10 items.

| Model              | $\chi^2$ (df) | CFI  | RMSEA | SRMR | $\Delta\chi^2$ ( $\Delta$ df) | $\Delta$ CFI | $\Delta$ RMSEA | $\Delta$ SRMR | Decision |
|--------------------|---------------|------|-------|------|-------------------------------|--------------|----------------|---------------|----------|
| Config             | 143.84(68)    | .971 | .068  | .047 |                               |              |                |               | accept   |
| Metrics (loading)  | 158.91(76)    | .968 | .067  | .054 | 15.07 (8);<br>$p=.058$        | .003         | .001           | .007          | accept   |
| Scalar (intercept) | 233.67 (84)   | .943 | .086  | .065 | 74.76 (8);<br>$p<.0001$       | .026         | .019           | .011          | reject   |

Partial measurement invariance (configural, metric, and scalar) was established with 8 of the 10 items (1-4,6-8, 10).

Table S23: Measurement invariance tests for MIL with 8 items.

| Model              | $\chi^2$ (df) | CFI  | RMSEA | SRMR | $\Delta\chi^2$ ( $\Delta$ df) | $\Delta$ CFI | $\Delta$ RMSEA | $\Delta$ SRMR | Decision |
|--------------------|---------------|------|-------|------|-------------------------------|--------------|----------------|---------------|----------|
| Config             | 98.16(38)     | .971 | .081  | .047 |                               |              |                |               | accept   |
| Metrics (loading)  | 110.09(44)    | .968 | .079  | .056 | 11.93 (6),<br>$p=.064$        | .003         | .002           | .008          | accept   |
| Scalar (intercept) | 119.99(50)    | .966 | .076  | .057 | 9.90(6);<br>$p=.129$          | .002         | .003           | .001          | accept   |

### 3. Cultural Differences based on measurement invariant items

Only state well-being (WHO-10), state optimism (SOM\_7), and meaning in life (MIL-presence, MIL-search) measures established strong (scalar) invariance across the two cultural groups. Thus cultural comparisons can be made on these measures only. The other measures are included in the tables for completeness.

Table S24. Cultural comparisons based on measurement invariance items (Time 1)

| Measure       | Number of items (specific item) | Canada                        |      |      | China                         |      |      | F (dfs)       | p     | $\eta_p^2$ |
|---------------|---------------------------------|-------------------------------|------|------|-------------------------------|------|------|---------------|-------|------------|
|               |                                 | Internal consistency $\alpha$ | Mean | SD   | Internal consistency $\alpha$ | Mean | SD   |               |       |            |
| WHO-10        | 5(1,3,4,6,10)                   | .84                           | 2.95 | 1.31 | .79                           | 3.83 | 1.06 | 75.72 (1,557) | <.001 | .12        |
| SWLS          | 5 (full scale)                  | .87                           | 4.70 | 1.26 | .87                           | 3.98 | 1.13 |               |       |            |
| SOM_7         | 6 (1-6)                         | .88                           | 3.30 | .83  | .84                           | 3.53 | .69  | 13.47(1,556)  | <.001 | .02        |
| BRC           | 4 (full scale)                  | .59                           | 3.73 | .59  | .69                           | 3.56 | .55  |               |       |            |
| MIL: presence | 4 (1,4-6)                       | .89                           | 4.27 | 1.34 | .84                           | 4.87 | .93  | 36.90 (1,553) | <.001 | .06        |
| MIL: search   | 4 (3,7,8,10)                    | .88                           | 4.99 | 1.22 | .83                           | 5.16 | .87  | 3.59(1,553)   | =.059 | .01        |
| LOT-R         | 6 (full scale)                  | .83                           | 3.25 | .74  | .62                           | 3.68 | .50  |               |       |            |

Table S25. Cultural comparisons based on measurement invariance items (Time 2)

| Measure       | Number of items (specific item) | Canada                        |      |      | China                         |      |      | F (dfs)       | p     | $\eta_p^2$ |
|---------------|---------------------------------|-------------------------------|------|------|-------------------------------|------|------|---------------|-------|------------|
|               |                                 | Internal consistency $\alpha$ | Mean | SD   | Internal consistency $\alpha$ | Mean | SD   |               |       |            |
| WHO-10        | 5(1,3,4,6,10)                   | .82                           | 3.50 | 1.34 | .79                           | 4.43 | 1.05 | 72.36 (1,480) | <.001 | .13        |
| SWLS          | 5                               | .87                           | 4.57 | 1.20 | .89                           | 4.09 | 1.13 |               |       |            |
| SOM_7         | 6 (1-6)                         | .90                           | 3.29 | .84  | .87                           | 3.52 | .78  | 11.07(1,480)  | =.001 | .02        |
| BRC           | 4                               | .66                           | 3.65 | .64  | .67                           | 3.57 | .54  |               |       |            |
| MIL: presence | 3 (1,4,6)                       | .88                           | 4.12 | 1.34 | .81                           | 4.75 | .97  | 34.20 (1,479) | <.001 | .07        |
| MIL: search   | 5 (2,3,7,8,10)                  | .92                           | 4.91 | 1.22 | .87                           | 5.09 | .84  | 3.52 (1,479)  | =.061 | .01        |

### 4. Factor loadings based on data from Time 1

Table S26. Factor loadings for Adapted WHO (full scale) at Time 1.

|         | Canada | China |
|---------|--------|-------|
| Item 1  | -.58   | -.36  |
| Item 2  | .74    | .49   |
| Item 3  | .79    | .76   |
| Item 4  | .66    | .64   |
| Item 5  | .79    | .79   |
| Item 6  | .76    | .80   |
| Item 7  | .76    | .72   |
| Item 8  | .73    | .40   |
| Item 9  | .59    | .54   |
| Item 10 | .75    | .74   |

Table S27. Factor loadings for Adapted WHO (5 items) at Time 1.

|         | Canada | China |
|---------|--------|-------|
| Item 1  | -.59   | -.34  |
| Item 3  | .80    | .83   |
| Item 4  | .68    | .67   |
| Item 6  | .74    | .75   |
| Item 10 | .74    | .72   |

Table S28. Factor loadings for SWLS (full scale) at Time 1.

|        | Canada | China |
|--------|--------|-------|
| Item 1 | .84    | .87   |
| Item 2 | .73    | .81   |
| Item 3 | .86    | .82   |
| Item 4 | .75    | .78   |
| Item 5 | .64    | .50   |

Table S29. Factor loadings for State Optimism (full scale) at Time 1.

|        | Canada | China |
|--------|--------|-------|
| Item 1 | .75    | .71   |
| Item 2 | .79    | .74   |
| Item 3 | .86    | .78   |
| Item 4 | .57    | .63   |
| Item 5 | .84    | .80   |

|        |     |     |
|--------|-----|-----|
| Item 6 | .70 | .52 |
| Item 7 | .84 | .78 |

Table S30. Factor loadings for State Optimism (6 items) at Time 1.

|        | Canada | China |
|--------|--------|-------|
| Item 1 | .77    | .73   |
| Item 2 | .78    | .73   |
| Item 3 | .85    | .78   |
| Item 4 | .58    | .62   |
| Item 5 | .85    | .79   |
| Item 6 | .68    | .52   |

Table S31. Factor loadings for Brief Resilience Coping Scale (full scale) at Time 1

|        | Canada | China |
|--------|--------|-------|
| Item 1 | .65    | .55   |
| Item 2 | .40    | .53   |
| Item 3 | .71    | .71   |
| Item 4 | .37    | .64   |

Table S32. Factor loadings for Meaning in Life Scale (full scale) at Time 1

|         | Canada |          | China  |          |
|---------|--------|----------|--------|----------|
|         | Search | Presence | Search | Presence |
| Item 1  | -.02   | .75      | .05    | .75      |
| Item 2  | .75    | -.01     | .62    | .18      |
| Item 3  | .79    | .19      | .69    | .10      |
| Item 4  | .04    | .85      | -.03   | .87      |
| Item 5  | .02    | .79      | .03    | .63      |
| Item 6  | -.01   | .86      | .00    | .73      |
| Item 7  | .79    | .08      | .65    | -.06     |
| Item 8  | .86    | -.05     | .84    | -.02     |
| Item 9  | .06    | -.65     | .03    | -.64     |
| Item 10 | .79    | -.18     | .79    | -.08     |

Table S33. Factor loadings for Meaning in Life Scale (8 items) at Time 1

|         | Canada |          | China  |          |
|---------|--------|----------|--------|----------|
|         | Search | Presence | Search | Presence |
| Item 1  | .02    | .76      | .04    | .76      |
| Item 3  | .74    | .19      | .72    | .11      |
| Item 4  | .03    | .85      | -.03   | .83      |
| Item 5  | .00    | .79      | .02    | .65      |
| Item 6  | -.02   | .86      | -.01   | .75      |
| Item 7  | .79    | .08      | .60    | -.03     |
| Item 8  | .90    | -.04     | .84    | .00      |
| Item 10 | .80    | -.16     | .80    | -.05     |

## 5. Factor loadings based on data from Time 2

Table S34. Factor loadings for Adapted WHO (full scale) at Time 2.

|         | Canada | China |
|---------|--------|-------|
| Item 1  | -.59   | -.38  |
| Item 2  | .75    | .63   |
| Item 3  | .71    | .75   |
| Item 4  | .71    | .72   |
| Item 5  | .82    | .80   |
| Item 6  | .75    | .74   |
| Item 7  | .74    | .72   |
| Item 8  | .77    | .42   |
| Item 9  | .65    | .58   |
| Item 10 | .68    | .77   |

Table S35. Factor loadings for Adapted WHO (5 items) at Time 2.

|         | Canada | China |
|---------|--------|-------|
| Item 1  | -.57   | -.37  |
| Item 3  | .77    | .79   |
| Item 4  | .74    | .71   |
| Item 6  | .71    | .72   |
| Item 10 | .66    | .78   |

Table S36. Factor loadings for SWLS (full scale) at Time 2.

|        | Canada | China |
|--------|--------|-------|
| Item 1 | .83    | .87   |

|        |     |     |
|--------|-----|-----|
| Item 2 | .80 | .86 |
| Item 3 | .89 | .87 |
| Item 4 | .68 | .73 |
| Item 5 | .59 | .62 |

Table S37. Factor loadings for State Optimism (full scale) at Time 2.

|        | Canada | China |
|--------|--------|-------|
| Item 1 | .81    | .71   |
| Item 2 | .85    | .73   |
| Item 3 | .85    | .80   |
| Item 4 | .59    | .72   |
| Item 5 | .87    | .84   |
| Item 6 | .69    | .59   |
| Item 7 | .81    | .69   |

Table S38. Factor loadings for State Optimism (6 items) at Time 2.

|        | Canada | China |
|--------|--------|-------|
| Item 1 | .81    | .71   |
| Item 2 | .85    | .72   |
| Item 3 | .85    | .81   |
| Item 4 | .59    | .73   |
| Item 5 | .87    | .83   |
| Item 6 | .69    | .60   |

Table S39. Factor loadings for Brief Resilience Coping Scale (full scale) at Time 2.

|        | Canada | China |
|--------|--------|-------|
| Item 1 | .63    | .53   |
| Item 2 | .63    | .60   |
| Item 3 | .75    | .66   |
| Item 4 | .34    | .55   |

Table S40. Factor loadings for Meaning in Life (full scale) at Time 2.

|        | Canada |          | China  |          |
|--------|--------|----------|--------|----------|
|        | Search | Presence | Search | Presence |
| Item 1 | -.03   | .84      | .09    | .75      |
| Item 2 | .80    | -.06     | .83    | .03      |
| Item 3 | .79    | .16      | .76    | -.08     |

|         |      |      |      |      |
|---------|------|------|------|------|
| Item 4  | .03  | .87  | .01  | .84  |
| Item 5  | .00  | .74  | .01  | .72  |
| Item 6  | .00  | .79  | -.06 | .73  |
| Item 7  | .80  | .04  | .79  | -.02 |
| Item 8  | .90  | .01  | .68  | .08  |
| Item 9  | -.01 | -.69 | .08  | -.63 |
| Item 10 | .86  | -.11 | .74  | .01  |

Table S41. Factor loadings for Meaning in Life (8 items) at Time 2.

|         | Canada |          | China  |          |
|---------|--------|----------|--------|----------|
|         | Search | Presence | Search | Presence |
| Item 1  | -.03   | .86      | .08    | .74      |
| Item 2  | .81    | -.07     | .82    | .05      |
| Item 3  | .79    | .17      | .76    | -.07     |
| Item 4  | .03    | .85      | .00    | .83      |
| Item 6  | .00    | .81      | -.07   | .74      |
| Item 7  | .80    | .03      | .79    | -.04     |
| Item 8  | .90    | .01      | .68    | .10      |
| Item 10 | .86    | -.11     | .75    | -.01     |

**6. Mediation analyses based on cross-sectional data at Time 1.**

IV = culture (China = .5, Canada = -.5). The tests were done with Hayes' Process 3.5 for SPSS (2018) with 10,000 bootstrapping samples.

Table S42. Mediation analysis based on cross-sectional data at Time 1.

| DV         | Mediator   | a path<br>(Culture → mediator)            | b path<br>(Mediator → DV)                 | c' path<br>(IV → DV<br>controlling<br>for mediator) | ab<br>(indirect<br>effect) | 95% CI for<br>indirect effect |
|------------|------------|-------------------------------------------|-------------------------------------------|-----------------------------------------------------|----------------------------|-------------------------------|
| Well-being | Optimism   | $b = 0.17,$<br>$t = 2.59,$<br>$p = .0099$ | $b = 0.98,$<br>$t = 21.62,$<br>$p < .001$ | $b = 0.48,$<br>$t = 6.90,$<br>$p < .001$            | $b = 0.16$                 | [0.04, 0.29]                  |
| Meaning    | Optimism   | $b = 0.17,$<br>$t = 2.66,$<br>$p = .008$  | $b = 0.80,$<br>$t = 14.78,$<br>$p < .001$ | $b = 0.30,$<br>$t = 3.60,$<br>$p < .001$            | $b = 0.14$                 | [0.03, 0.21]                  |
| Optimism   | Well-being | $b = 0.65,$<br>$t = 6.87,$<br>$p < .001$  | $b = 0.47,$<br>$t = 21.62,$<br>$p < .001$ | $b = -0.13,$<br>$t = -2.68,$<br>$p = .008$          | $b = 0.30$                 | [0.22, 0.40]                  |
| Optimism   | Meaning    | $b = 0.44,$<br>$t = 4.48,$<br>$p < .001$  | $b = 0.36,$<br>$t = 14.78,$<br>$p < .001$ | $b = 0.02,$<br>$t = 0.32,$<br>$p = .753$            | $b = 0.16$                 | [0.09, 0.23]                  |

Optimism = state optimism

Well-being = state well-being  
 Meaning = meaning presence

**7. Mediation analyses based on cross-sectional data at Time 2.**

IV = culture (China = .5, Canada = -.5). The tests were done with Hayes' Process 3.5 for SPSS (2018) with 10,000 bootstrapping samples.

Table S43. Mediation analysis based on cross-sectional data at Time 2.

| DV         | Mediator   | a path<br>(Culture →<br>mediator)                       | b path<br>(Mediator<br>→ DV)                             | c' path<br>(IV → DV<br>controlling<br>for mediator)        | ab<br>(indirect<br>effect) | 95% CI for<br>indirect effect |
|------------|------------|---------------------------------------------------------|----------------------------------------------------------|------------------------------------------------------------|----------------------------|-------------------------------|
| Well-being | Optimism   | <i>b</i> = 0.17,<br><i>t</i> = 2.48,<br><i>p</i> = .014 | <i>b</i> = 0.97,<br><i>t</i> = 18.14,<br><i>p</i> < .001 | <i>b</i> = 0.59,<br><i>t</i> = 7.19,<br><i>p</i> < .001    | <i>b</i> = 0.17            | [0.03, 0.30]                  |
| Meaning    | Optimism   | <i>b</i> = 0.17,<br><i>t</i> = 2.52,<br><i>p</i> = .012 | <i>b</i> = 0.77,<br><i>t</i> = 13.80,<br><i>p</i> < .001 | <i>b</i> = 0.22,<br><i>t</i> = 2.52,<br><i>p</i> = .012    | <i>b</i> = 0.14            | [0.03, 0.24]                  |
| Optimism   | Well-being | <i>b</i> = 0.75,<br><i>t</i> = 7.16,<br><i>p</i> < .001 | <i>b</i> = 0.42,<br><i>t</i> = 18.14,<br><i>p</i> < .001 | <i>b</i> = -0.14,<br><i>t</i> = - 2.58,<br><i>p</i> = .010 | <i>b</i> = 0.32            | [0.23, 0.41]                  |
| Optimism   | Meaning    | <i>b</i> = 0.35,<br><i>t</i> = 3.50,<br><i>p</i> < .001 | <i>b</i> = 0.37,<br><i>t</i> = 13.80,<br><i>p</i> < .001 | <i>b</i> = 0.05,<br><i>t</i> = 0.77,<br><i>p</i> = .445    | <i>b</i> = 0.13            | [0.06, 0.21]                  |

Optimism = state optimism  
 Well-being = state well-being  
 Meaning = meaning presence

**8. Longitudinal Effects**

Table S44. Longitudinal Effects.

|                                   | <i>b</i> | <i>t</i> | <i>p</i> |
|-----------------------------------|----------|----------|----------|
| <b>DV: Well-being at T2</b>       |          |          |          |
| Well-being at T1                  | .51      | 9.66     | < .001   |
| Culture                           | .34      | 3.93     | < .001   |
| Optimism at T1                    | .28      | 3.80     | < .001   |
| Culture X Optimism                | -.23     | -2.05    | .041     |
| Simple slopes for Euro-Canadians  | .40      | 4.35     | < .001   |
| Simple slopes for Chinese         | .17      | 1.83     | .068     |
| <b>DV: Well-being at T2</b>       |          |          |          |
| Well-being at T1                  | .60      | 13.58    | < .001   |
| Culture                           | .28      | 3.20     | .002     |
| Meaning-presence at T1            | .13      | 2.82     | .005     |
| Culture X Meaning-presence        | .03      | .38      | .701     |
| <b>DV: Meaning-presence at T2</b> |          |          |          |

|                                   |      |       |        |
|-----------------------------------|------|-------|--------|
| Meaning-presence at T1            | .66  | 19.13 | < .001 |
| Culture                           | -.03 | -.39  | .698   |
| Optimism at T1                    | .16  | 3.02  | .003   |
| Culture X Optimism                | -.08 | -.92  | .356   |
| <b>DV: Meaning-presence at T2</b> |      |       |        |
| Meaning-presence at T1            | .66  | 19.39 | < .001 |
| Culture                           | -.08 | -1.12 | .265   |
| Well-being at T1                  | .12  | 3.28  | .001   |
| Culture X Well-being              | -.02 | -.36  | .719   |
| <b>DV: Optimism at T2</b>         |      |       |        |
| Optimism at T1                    | .67  | 15.47 | < .001 |
| Culture                           | -.03 | -.62  | .534   |
| Well-being at T1                  | .06  | 2.06  | .040   |
| Culture X Well-being              | .03  | .63   | .528   |
| <b>DV: Optimism at T2</b>         |      |       |        |
| Optimism at T1                    | .68  | 18.49 | < .001 |
| Culture                           | -.02 | -.41  | .679   |
| Meaning-presence at T1            | .07  | 2.77  | .006   |
| Culture X Meaning-presence        | .03  | .74   | .458   |

## 9. Culture and co-occurrence of positive and negative affect.

Based on previous research, one may expect stronger dialectical thinking among Chinese participants than Euro-Canadian participants. Unfortunately, we were not able to measure it directly due to resource constraints. However, given that we measured both positive and negative affect, we could examine the co-occurrence of positive and negative affect as a proximate indication of dialecticism, which may manifest itself in the experience of positive and negative affect simultaneously (Spencer-Rodgers et al., 2010). Following previous research, we computed the index of co-occurrence of affect in two ways: (1) MIN – the smallest value of all positive and negative affect ratings (Schimmack, 2001), and (2) Residualized MIN (Grossmann et al., 2016). According to Schimmack (2001), the MIN index (i.e., the intensity of the weaker affect in unipolar ratings) represents the extent to which positive and negative affects are mutually exclusive. Thus, higher numbers indicate more mixed emotions, while lower numbers indicate less mixed emotions. Consistent with the literature, Chinese scored higher than Euro-Canadians on both indices, as seen in Table S1. The findings indicate that the co-occurrence of positive and negative affect was stronger among Chinese than among Euro-Canadian participants. These results seem to suggest that dialecticism was stronger among Chinese participants than Euro-Canadian participants based on their affective experiences.

Table S45: The Co-Occurrence of Positive and Negative Affect.

| Index       | Country | Mean | SD   | F(df)              | p      | $\eta_p^2$ |
|-------------|---------|------|------|--------------------|--------|------------|
| MIN (T1)    | China   | 1.79 | 1.52 | $F(1,557) = 4.56$  | .033   | .01        |
|             | Canada  | 1.54 | 1.29 |                    |        |            |
| RESMIN (T1) | China   | .23  | 1.07 | $F(1,557) = 27.99$ | < .001 | .05        |

|             |        |      |      |                    |        |     |
|-------------|--------|------|------|--------------------|--------|-----|
|             | Canada | -.21 | .93  |                    |        |     |
| MIN (T2)    | China  | 1.96 | 1.52 | $F(1,480) = 8.07$  | .005   | .02 |
|             | Canada | 1.59 | 1.33 |                    |        |     |
| RESMIN (T2) | China  | .31  | 1.02 | $F(1,480) = 48.04$ | < .001 | .09 |
|             | Canada | -.31 | .95  |                    |        |     |

*Note.* T1 = Time 1; T2 = Time 2.
